# Supplementary material
Source: Springer Nature journal article supplement (https://www.springermedizin.de/resource/supplementary/13014_2012_750_MOESM4_ESM.pdf/9634002)

### A Colorimetric MTT (WST1) Assay

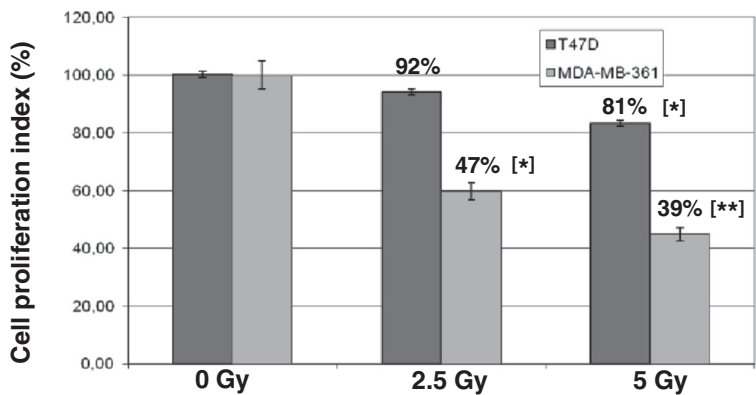

### B Clonogenic assay

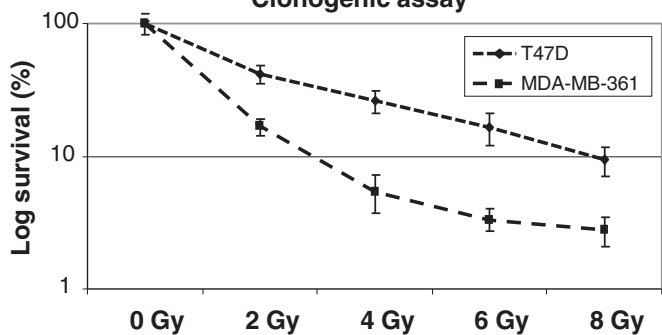

### C T47D 0 Gy 2.5 Gy 5 Gy 7.5 Gy

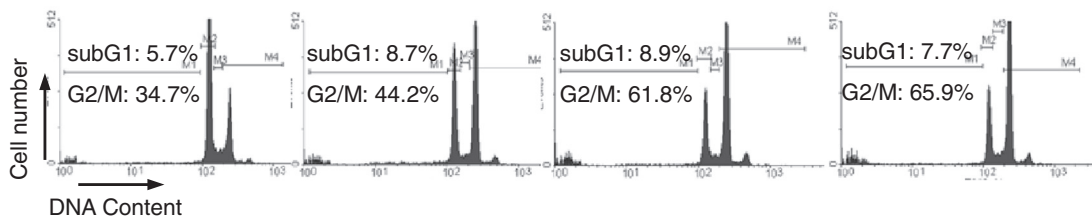

### MDA-MB-361

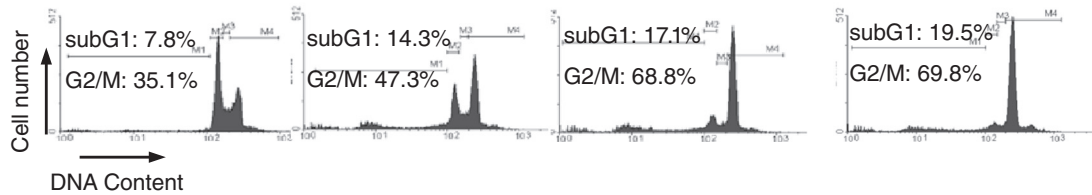

Supplement: MOESM4 [file 9634002]
